A comparison of four commercially available RNA extraction kits for wastewater surveillance of SARS-CoV-2 in a college population

Authors: Megan O'Brien<sup>1\*</sup>, Zachary C. Rundell<sup>2\*</sup>, Michelle D. Nemeč<sup>1</sup>, Laura M. Langan<sup>3</sup>, Jeffrey A. Back<sup>2</sup>, Joaquin N. Lugo<sup>4</sup>. <sup>1</sup> Molecular Biosciences Center, <sup>2</sup>Center for Reservoir and Aquatic Systems, <sup>3</sup>Department of Environmental Sciences, <sup>4</sup>Department of Psychology and Neuroscience, Baylor University, Waco, TX 76798, USA.

Keywords: wastewater-based epidemiology; WBE, sewage, COVID-19

Corresponding author

Dr. Joaquin N. Lugo  
Department of Psychology and Neuroscience  
One Bear Place 97334  
Baylor University  
Waco, TX 76798  
Tel: 254-71-2389  
Email: [Joaquin\\_lugo@baylor.edu](mailto:Joaquin_lugo@baylor.edu)

## Highlights

- Samples from smaller population densities make concentrating RNA vital for detection
- Pelleting may provide for more timely concentration and extraction of SARS-CoV-2 RNA
- RNA shields and PCR inhibitor removal may increase detection of RNA during RT-qPCR

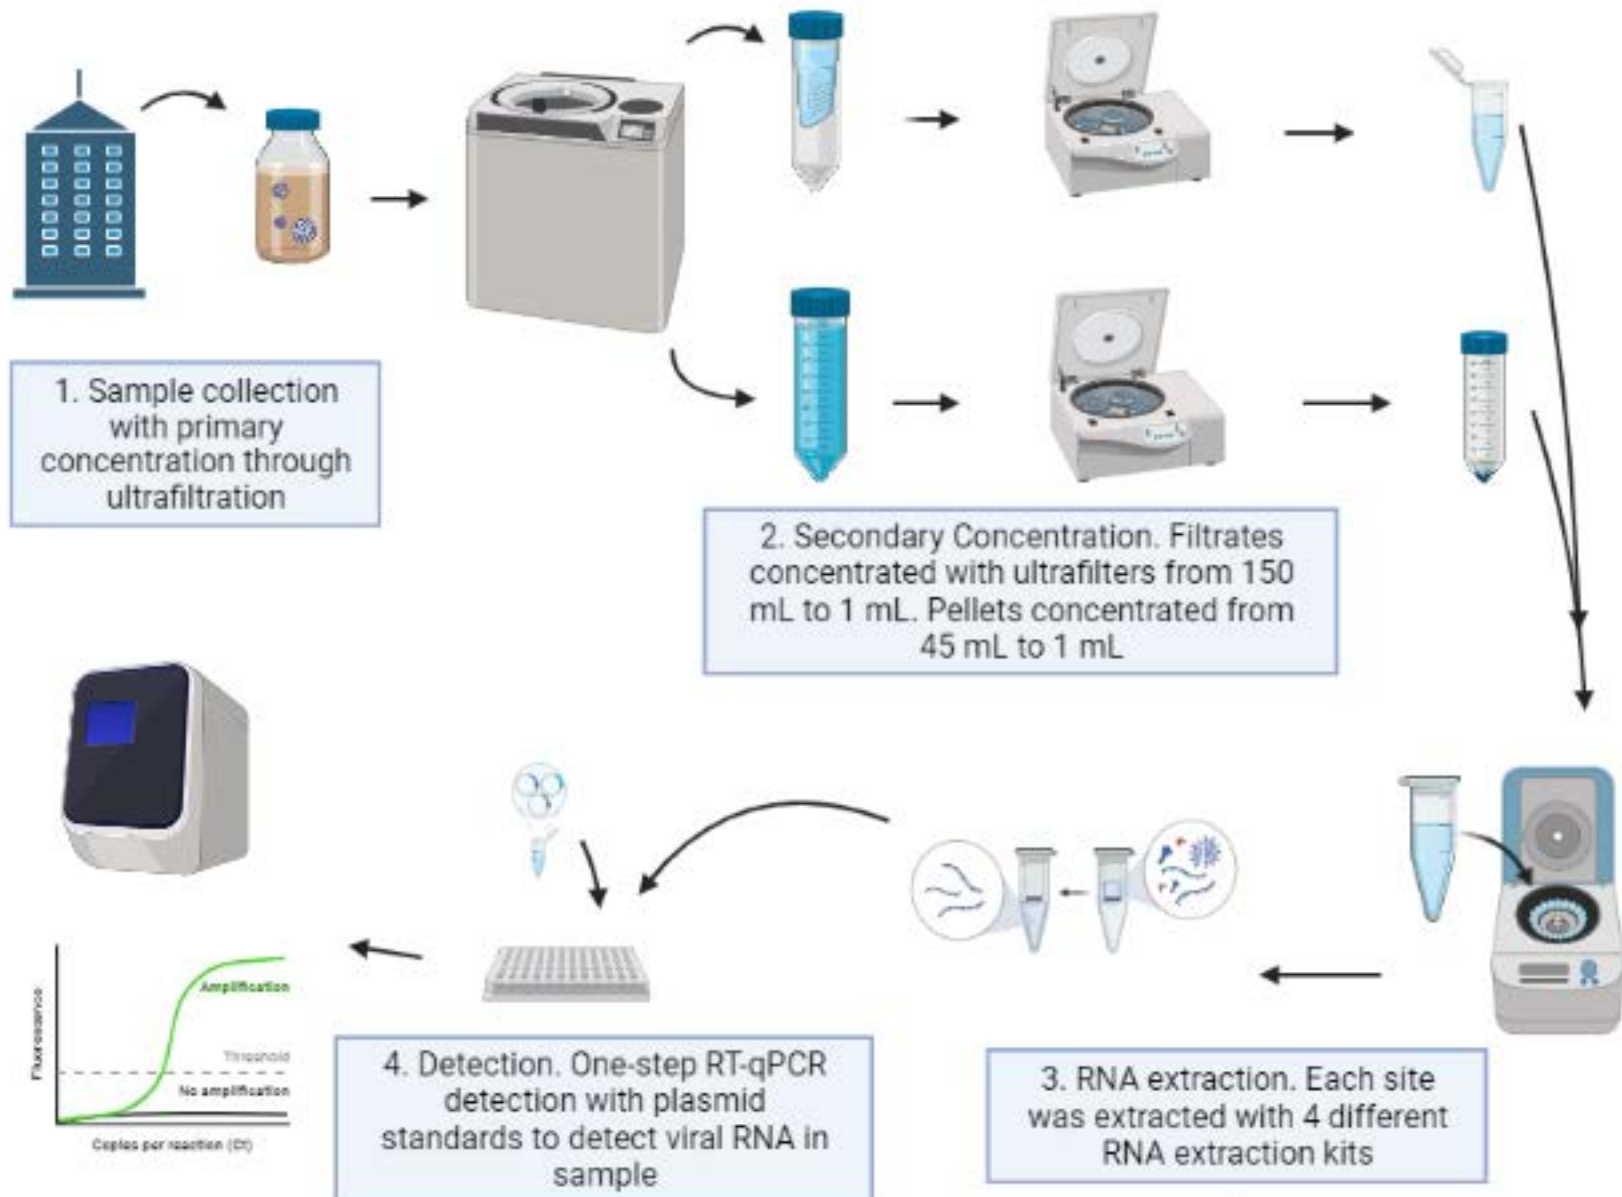

Running head: RNA extraction and SARS-CoV-2

1 *Abstract*

2 Localized wastewater surveillance has allowed for public health officials to gain a broader  
3 understanding of SARS-CoV-2 viral prevalence in the community allowing public health  
4 officials time to prepare for impending outbreaks. Given variable levels of virus in the  
5 population through public health interventions, proper concentration and extraction of viral RNA  
6 is a key step in ensuring accurate detections. With many commercial RNA extraction kits and  
7 methodologies available, the performance of 4 different kits were evaluated for SARS-CoV-2  
8 RNA detection in wastewater, specifically focusing on their applicability to lower population  
9 densities such as those at university campus dorms. Raw wastewater samples were collected at 4  
10 sites on a college campus over a 24 hour period as a composite sample. Included in these sites  
11 was an isolation site that housed students that tested positive for Covid-19 via nasopharyngeal  
12 swabs. These samples were analyzed using the following kits: Qiagen All Prep PowerViral  
13 DNA/RNA kit, New England BioLabs Monarch RNA MiniPrep Kit, and Zymo Quick RNA-  
14 Viral Kit, and the Zymo Quick-RNA Fecal/Soil Microbe MicroPrep Kit. All four sites were  
15 processed according to the manufacturer's guidelines. Extractions were then quantified with RT-  
16 qPCR one-step reactions using an N2 primer and a linearized plasmid standard. While the Zymo  
17 Quick-RNA Fecal/Soil Microbe MicroPrep Kit (also known as the Zymo Environ Water RNA  
18 Kit) only recovered approximately 73% (+/- 38%) SARS-CoV-2 RNA compared to the Zymo  
19 Quick-RNA Viral kit, it was the most time efficient kit to yield comparable results. This  
20 extraction kit had a cumulative processing time of approximately five hours compared, while the  
21 other three kits had processing times between approximately 9 and 9.5 hours. Based on the  
22 current research, the most effective kits for smaller population densities are pellet based and  
23 include a homogenization, inhibitor removal, and RNA preservation step.

24

Running head: RNA extraction and SARS-CoV-2

25 *1. Introduction*

26 On January 31, 2020, the WHO declared COVID-19 a Public Health Emergency of  
27 International Concern (Jee, 2020). Widespread testing of those with and without COVID-19  
28 symptoms, in combination with the numerous vaccine roll outs is vital to curtailing the current  
29 pandemic and future outbreaks. The current estimate of infected individuals is believed to be  
30 underestimated worldwide, with numerous nations initially encouraging testing for those only  
31 with symptoms. Therefore, those who are presymptomatic or asymptomatic are often less likely  
32 to be identified, thus posing a significant potential for transmission, with studies estimating that  
33 asymptomatic or presymptomatic transmission could be responsible for up to 50% of new cases  
34 (Ghandi et. al 2020, Moghadas et. al 2020).

35 A variety of diagnostic testing methods are available to determine if individuals are  
36 infected with COVID-19. Current diagnostic testing involves the collection and PCR analysis of  
37 infected cells and bodily fluids for the SARS-CoV-2 virus by drawing blood or collecting  
38 samples from the nose, mouth, throat, or lungs (Ravi et. al 2020). While useful, these testing  
39 methods are hazardous, resource-intensive, and invasive (Binnicker 2020).

40 Wastewater based epidemiology offers a promising method of Covid-19 surveillance that  
41 may solve some of these pressing issues. Although a relatively new field, it has conventionally  
42 been successfully used to estimate use of legal and illegal drugs of abuse and to evaluate human  
43 exposure to contaminants and pathogens as summarized in Lorenzo and Picó (2019). Active  
44 monitoring of SARS-CoV-2 RNA in wastewater can be a useful tool for identifying hotspots and  
45 has been demonstrated to serve as an early warning system for new outbreaks (Xagorarakis and  
46 O'Brien, 2019, Venugopal et. al 2020, Betancourt et. al 2021). This method is unique as it allows  
47 researchers to survey large groups of people quickly with fewer resources and staff. Wastewater

## Running head: RNA extraction and SARS-CoV-2

48 based epidemiology is also less intrusive compared to nasal swabs and reduces occupational  
49 exposure to SARS-CoV-2. Perhaps the largest benefit of wastewater surveillance is its efficiency  
50 and ability to view community prevalence. Thus, areas with higher viral copies may be focused  
51 on for individual testing efforts and public health interventions. Wastewater surveillance works  
52 due to SARS-CoV-2 RNA being detectable in the feces of both symptomatic and asymptomatic  
53 individuals (Hart and Halden, 2020, Mizumoto et. al 2020, Treibel et. al 2020), even after the  
54 individuals no longer had respiratory symptoms (Zheng et. al 2020, Mesoraca et. al 2020, Jones  
55 et. al 2020).

56 Wastewater based epidemiology is a powerful tool that can provide vital information  
57 about the spread of Covid-19 and can be useful in prioritizing diagnostic PCR testing. It has  
58 demonstrated its ability to effectively aide in detecting affected individuals so students could be  
59 tested or isolated to prevent further spread on a college campus (Betancourt et. al 2021).  
60 Unfortunately, a need exists for standardized techniques in applying this method to Covid-19  
61 surveillance (Ahmed et. al 2020a). As populations contributing to the wastewater vary in their  
62 characteristics, so does the overall matrix of the wastewater sample (Kitajima et. al 2020).  
63 Consequently, numerous methods of sample processing exist, which can make it difficult for  
64 researchers to choose an optimal method for accurate detection. Furthermore, sampling in small  
65 population densities adds another layer of complexity to detection due to a potential for lower  
66 viral loads than typical in municipalities. Monitoring in communities with low incidence has  
67 previously demonstrated high PCR Ct values and hence variable or unquantifiable data being  
68 collected due to very low concentrations of the viral fragment in the collected samples (D'Aoust  
69 et al. 2021).

## Running head: RNA extraction and SARS-CoV-2

70           The selection of an appropriate RNA isolation kit is a key component of processing  
71 samples that can have a major impact on the results yielded. This study aims to provide an  
72 overview of the efficacy and efficiency of four common RNA isolation kits produced by Zymo,  
73 Qiagen, and New England Biolabs when surveilling a small population for SARS-CoV-2 in  
74 wastewater. The endpoints examined in this study include a comparison of viral detection across  
75 all four kits as well as a qualitative description of each method.

## 76 *2. Materials and Methods*

### 77 *2.1 Sample Collection*

78           Wastewater was collected from 4 buildings in Waco, Texas on Baylor University's  
79 campus. Sites A-C were collected from 3 dormitories and with a total, combined population of  
80 approximately 850 students at time of collection. Included in these sites was a dormitory that  
81 consistently yielded non-detectable values (site B). An additional isolation site, (Site I) was also  
82 included, this site housed an unknown number of students who were isolated due to active  
83 SARS-CoV-2 infections.

84           Composite 8.64-liters of untreated raw wastewater samples were collected over a 24-hr  
85 period in polypropylene bottles from 11:00 am on 10/6/2020 to 10:45 am on 10/7/2020. ISCO  
86 model 6712 automatic samplers were programmed to collect composite samples in 90 mL  
87 increments every 15 minutes. The sample bottle chamber was filled with ice to keep the samples  
88 cold. Upon collection, each composite sample was mixed by hand and an aliquot was poured into  
89 a 250 mL polypropylene centrifuge bottle (Fisherbrand, catalog # 14-375-352) and stored on ice.  
90 Samples were processed approximately 1 hour after collection.

### 91 *2.2 RNA Concentration and Extraction*

Running head: RNA extraction and SARS-CoV-2

92           Following collection, raw wastewater samples were concentrated by centrifuging each  
93   250 mL sample in the original bottle at 4°C for 45 minutes on a coast deceleration setting so as  
94   not to disturb the pellet (AVANTI JXN 26, JS-7.5 rotor, 4700 RCF). Supernatant (150 mL) was  
95   collected and aliquoted for use in three of the extraction kits. The remaining 100 mL pellet was  
96   resuspended and used for the pellet-based extraction kit.

97           The resulting 150 mL filtrate was further concentrated using ultrafiltration with  
98   AMICON 15 mL conical filtration tubes (Sigma Aldrich; UFC901024). Filtrate was loaded in  
99   increments of 15 mL until the total collection volume had been reduced to~ 1000 µL (5000 RCF,  
100   Eppendorf A-4-62 swing-bucket rotor with adaptors). In some cases, the filters became clogged  
101   and a new ultrafilter was required and when necessary the sample was transferred to a new  
102   filtration tube. Concentrate was then aliquoted (~250 µL) and RNA exactions carried out using  
103   extraction kits 1-3: Qiagen All Prep PowerViral DNA/RNA kit (80244), New England BioLabs  
104   Monarch RNA MiniPrep Kit (T2010S) and Zymo Quick RNA-Viral (R1034) following  
105   manufacturer instructions.

106           For the pellet, 45 out of the 100 mL of the resuspended pellet was collected into 50 mL  
107   conical tubes. Urine conditioning buffer (3.150 mL, D3061-1-140) was added thoroughly mixed,  
108   then centrifuged (5000 RCF x 15 min, RT; Eppendorf FA-45-6-30 fixed rotor). Following  
109   centrifugation, the remaining filtrate was removed (~47.9 mL) leaving ~ 250 µL concentrated  
110   pellet composite. To this, 750 µL of RNA/DNA shield (Zymo, R1100-250) was then added to  
111   the sample and held at 4°C until extraction. All extractions took place in an RNase, DNase-free  
112   hood environment, following manufacturers guidelines. A field blank using in-house tap water  
113   was run for primary concentration/processing integrity. RNA extraction blanks using nuclease  
114   free water were included with each extraction batch and kit.



Running head: RNA extraction and SARS-CoV-2

### 115 2.3 PCR Analysis

116 Quantification of viral load was determined via RT-qPCR (QuantStudios 6 Flex) using  
117 New England BioLabs Enzyme and Probe Master kit (New England Biolabs, Catalog E3006X)  
118 with IDT N2 RUO primers (IDT, catalog #10006713). Each plate contained triplicates of each  
119 condition; whose CT's were averaged to get the mean CT for each sample for each extraction  
120 method. The standards used contained a linearized 200,000 cp/uL N plasmid standard (IDT,  
121 catalog #10006625) which was diluted into a 10,000 copies/ $\mu$ L stock. Each plate's standard  
122 curve was conducted using an 8 series dilution, starting with 10,000 copies/ $\mu$ L to 2.441  
123 copies/ $\mu$ L. For the LOQ, CT values corresponding with a value of less than 2.441 copies/ $\mu$ L  
124 were listed as "not detected" values. In order to accurately assess whether inhibitors are acting  
125 upon collected samples, 1:2 dilutions were made from the RNA extract directly prior to plate  
126 analysis. Non-template controls confirmed PCR integrity. More information on PCR analysis can  
127 be found in the Supplemental Information.

### 128 3. Results

129 To benchmark the performance of the kits, the controls (viz. field blanks, extraction  
130 blanks and PCR blanks, and no template controls) were first all confirmed to be non-detectable  
131 for SARS-CoV-2. Thereafter, the individual sites were examined. Site B acts as a control for the  
132 methodology, with consistency low incidence levels historically recorded. For this sampling  
133 location, Site B resulted in a non-detectable sample across all RNA extraction kits evaluated  
134 (Table 1), with contrastingly high viral loads identified at the isolation site. In contrast, Site A  
135 and C both tested positive, with detectable levels consistent even between dilutions, with the  
136 exception of the Monarch RNA Miniprep Kit, which saw a non-detected value for the original  
137 sample, yet when diluted yielded a highly positive value for site A. For this specific kit, the lack

Running head: RNA extraction and SARS-CoV-2

138 of an inhibitor removal step may have allowed for a co-concentration of inhibitors to occur in  
139 this sample for this kit, where dilutions also diluted inhibitors, allowing for better detection.  
140 Otherwise, our samples performed better undiluted. This could be due to low viral loads in an  
141 already diluted matrix. There were differences between each of the kits' amplifications, of which  
142 the Qiagen kit performed consistently between dilutions, potentially indicating adequate inhibitor  
143 removal, but yielded lower values compared to the other kits.

144 Between the kits, the Zymo Quick RNA-Viral with Inhibitor Removal consistently  
145 yielded the highest resulting viral loads. There were similarities between the Zymo Fecal Kit and  
146 the Quick-Viral RNA kit processes, including inhibitor removal steps. On average, the Zymo  
147 Fecal Kit values ranging from approximately 7,300 to 17,000,000 copies/L whereas the Zymo  
148 Quick-Viral RNA kit ranged from 9,800 to 23,000,000 copies/L. The Zymo Fecal Kit recovered  
149 approximately 73% (+/- 38%) more SARS-CoV-2 RNA than the Zymo Quick-Viral RNA kit per  
150 site. Examining the % Coefficients of variation between each site, each method, and each  
151 dilution factor was between 4%-87%. The Zymo Quick-Viral RNA kit had the lowest  
152 Coefficients of variations, whereas Qiagen's kit had some of the higher values. The Zymo Fecal  
153 Kit pellet showed dilutions may improve Coefficients of variation values. CV values were  
154 calculated based off the final calculated cp/L. CV values to interpret PCR integrity can be found  
155 in Supplemental Table 4.

156 In regards to the isolation site, the New England BioLabs kit obtained the highest viral  
157 load at 45,000,000 copies/L in the original sample, and 28,000,000 copies/L in the diluted  
158 sample. However, New England BioLabs kit was the most variable in terms of consistency  
159 between dilutions. Here, the original sample carried a higher load (45.3%) than the diluted

Running head: RNA extraction and SARS-CoV-2

160 sample. The Zymo Fecal kit had the least variation between the dilution series (0.99%), as we  
161 saw with the site comparisons.

162 The impact of PCR inhibitors was examined using the isolation location (Site I), with  
163 little difference observed in the Zymo Fecal kit between concentrate and diluted sample in  
164 comparison to other kits. Interestingly, cp/L at the isolation site is markedly lower in the Qiagen  
165 kit compared to others which is surprisingly considering that this kit has been used heavily in  
166 wastewater testing of large municipalities (Fig. 1).

167 Impact of PCR inhibitors were examined using the isolation location (Site I), with little  
168 difference observed in the Zymo Fecal kit between concentrate and diluted sample in comparison  
169 to other kits. Interestingly, cp/L at the isolation site is markedly lower in the Qiagen kit  
170 compared to others which is surprisingly considering that this kit has been used heavily in  
171 wastewater testing of large municipalities.

### 172 *3.2 Population Normalization*

173 Normalizing the data by population is another key in determining hotspots for potential  
174 outbreaks. If the viral load per resident is high relative to the surrounding sites, this could be a  
175 potential indicator of an upcoming outbreak. Following normalizing to population size, Site A  
176 population (539) and Site C population (153), there is consistent differences in viral loads  
177 between extraction kits and between sites, with the Qiagen kit reporting markedly lower viral  
178 levels than the other kits examined. (Figure 2).

179

### 180 *3.3 Qualitative Results*

Running head: RNA extraction and SARS-CoV-2

181 Previous work has found that there is a lack of qualitative information for wastewater  
182 concentration and RNA extraction methodologies (Ahmed et. al 2020a). Therefore, we have  
183 provided qualitative information based on previous experiments. All times are approximate, and  
184 prices are listed as current for time of publication (Table 2). Footnotes can be found in  
185 Supplemental Information.

186 These times are total working hours and assume no breaks in between each section of  
187 processing, for only four samples. There is also the assumption that the technician has conducted  
188 the protocols prior to beginning the process. It should be noted that at the time of publication, the  
189 Zymo Quick-RNA Fecal/Soil Microbe MicroPrep Kit has been renamed as the Zymo Environ  
190 Water RNA Kit (Zymo Research, catalog #R2042), in which the only difference is that the urine  
191 conditioning buffer and DNA/RNA shield are included with the kit purchase.

192 Filtrate-based methods that use ultrafiltration considerably increased processing times  
193 due to long centrifuge runs and the potential for clogging filters (Table 2). The Zymo Quick-  
194 RNA Fecal/Soil MicroPrep kit required the most time, but yielded results more consistently  
195 across the board. This methodology also does not require the use of a floor centrifuge, meaning it  
196 may be available to a wider audience looking to start local surveillance.

#### 197 *4. Discussion*

198 The ongoing pandemic of SARS-CoV-2 has allowed for greater expansion of wastewater based  
199 epidemiology (WBE) as a tool for public health surveillance. Recent testing conducted at the  
200 University of Arizona demonstrated the ability for campus wastewater surveillance to be used as  
201 an early detection system to pinpoint potential hot spots and isolate individuals, even before  
202 symptoms show (Betancourt et. al 2021). Historically, WBE has focused mostly on enteric

## Running head: RNA extraction and SARS-CoV-2

203 viruses, where many of these viruses are non-enveloped. Since SARS-CoV-2 is an enveloped  
204 virus, this provides additional challenges for its concentration and detection in wastewater (Ye  
205 et. al 2016, Polo et. al 2020, Torii et. al 2021). Traditional methods of RNA extraction, such as  
206 polyethylene glycol precipitation (PEG) are not as effective at concentrating enveloped viruses  
207 since the lipid membrane is more sensitive and possibly degraded by organic solvents like  
208 chloroform (Polo et. al 2020) and in past publications for SARS-CoV-2 have returned lower  
209 recovery efficiencies (Ahmed et. al 2020b, Torii et. al 2021). The current study populations  
210 varied from 140-540 persons per site, compared with upwards of 10,000 or more for a municipal  
211 wastewater treatment plant. Since PEG precipitations require small initial volumes, low  
212 concentration/high volume samples are at a disadvantage and rely heavily on primary  
213 concentration methods to be effective (Lu et. al 2020). The Qiagen AllPrep PowerViral  
214 DNA/RNA kit has been used frequently in testing municipal wastewater for SARS-CoV-2 RNA,  
215 where a higher population density is contributing to the collection sample. When considering  
216 smaller populations and thus smaller RNA inputs, the Qiagen kit did not perform as well in our  
217 study. This could be due to the selectivity of combined RNA/DNA columns, or the lack of  
218 DNA/RNA preservation (such as DNA/RNA shield or urine conditioning buffer) throughout the  
219 long filtration steps.

220 Primary concentration from raw wastewater samples has been demonstrated as an  
221 obstacle in effectively concentrating viral loads (Hamouda et. al 2021, Ahmed et. al 2020b).  
222 Pellet-based methods have gained traction recently for higher quality and higher quantity of viral  
223 copies per sample (Kitamura et. al 2021, Pérez-Cataluña et. al 2021, D'Aoust et. al 2020,  
224 Graham et. al 2021). The filtrate based kits used in this study required larger sample volumes  
225 compared to the pellet-based kits, and the filtrate based kits also require an additional

Running head: RNA extraction and SARS-CoV-2

226 ultrafiltering step. Ultrafilter clogging was an issue with ultrafiltering, and loss of viral load is  
227 assumed with each tube transfer. Consumables associated with primary concentration, such as  
228 ultrafilters and 50 mL Falcon tubes, are becoming increasingly difficult to obtain due to  
229 backordering.

230 Finding effective methods to accurately identify low SARS-CoV-2 viral loads in  
231 wastewater are important for sectors such as hospitals, nursing homes, or schools, which have a  
232 lower flow rates than municipal wastewater treatment plants that are normally investigated  
233 during broad surveillances. The Qiagen All Prep PowerViral kit columns select for both DNA  
234 and RNA, where RNA could be potentially lost. New England BioLabs suggests the use of their  
235 RNA Cleanup Kit to aide in better recover/prevent RNA degradation. The Zymo Quick-RNA  
236 Fecal/Soil MicroPrep Kit included two forms of RNA preservation (DNA/RNA shield and urine  
237 conditioning buffer) which may have aided in its higher recoveries. Based on these results, we  
238 would recommend choosing a kit that specifically targets RNA extraction, and not a combined  
239 kit. This would allow for DNA removal as well, with which we saw increased detection in RNA  
240 viral loads. Homogenization of samples prior to extraction can aide in breaking viral capsids and  
241 releasing viral RNA. The Qiagen kit did not include filtrate homogenization steps, which could  
242 have affected its lower detection values. A kit that includes an inhibitor removal component is  
243 also vital, even in samples with low population density. The Monarch Kit did not include an  
244 inhibitor removal step during the extraction process, whereas the other kits involved at least one  
245 RNA inhibitor removal step. This would indicate that inhibitor removal was indeed necessary to  
246 see higher amplifications in CT values, since diluting inhibited samples is known to increase the  
247 efficiency of primer binding to cDNA, where inhibitors themselves are then diluted (Hata et. al

Running head: RNA extraction and SARS-CoV-2

248 2015) Dilutions could be conducted in the instance that a kit with inhibitor removal is  
249 unavailable.

250 A greater need for surveillance raises questions with cost and accessibility. For smaller  
251 sampling canvases, such as hospitals or nursing homes, a kit that can quantify smaller amount of  
252 the virus accurately is important. Further, the ability to conduct in house processing would  
253 greatly alleviate the expenditures of sending samples out to another lab. Time is also an  
254 important factor to consider while choosing an extraction method. Depending on the number of  
255 samples, as well as sample composition, time can vary greatly.

256 Since viral shedding through feces can be seen in both symptomatic and  
257 asymptomatic/presymptomatic patients, health officials can see larger trends in community  
258 prevalence than through nasal swabbing alone (Hart et. al 2020, Mizumoto et. al 2020, Treibel et.  
259 al 2020). Duration of viral shedding in symptomatic patients can vary anywhere from a matter  
260 14-21 days (Wu, 2021). It is indicated that viral shedding through feces precedes symptoms of  
261 COVID-19, and thus is imperative that precautionary measures be taken as soon as possible to  
262 prevent widespread contagion throughout the sample population, even in low prevalence areas  
263 (Randazzo et. al 2020). Results from this study were used to choose a concentration method and  
264 RNA extraction kit for Baylor University's campus wide wastewater surveillance program for  
265 the spring of 2021.

## 266 *5. Conclusion*

267 The results of this study show that a pellet-based RNA extraction kit that includes an  
268 inhibitor removal and RNA preservation step may yield the most consistent, timely, and accurate  
269 results. These additional steps may be why the Zymo Quick-RNA Fecal/Soil Microbe MicroPrep

Running head: RNA extraction and SARS-CoV-2

270 (also called the Zymo Environ Water RNA kit) was the most effective and efficient kit with the  
271 samples we used in the study. In contrast, the least effective kit was the Qiagen All Prep  
272 PowerViral DNA/RNA Kit. This was likely due to the absence of a preservation step and  
273 inefficiencies stemming from the kit selecting for both DNA and RNA. For filtrate based  
274 methods, we recommend using the Zymo Quick-RNA Viral kit as an effective and efficient  
275 method of wastewater based epidemiological analysis in concentrated wastewater samples,  
276 especially in smaller population densities.

277 *Acknowledgements*

278 We would like to acknowledge the financial support from Baylor University and for support  
279 from Dr. Bryan Brooks and Dr. Kevin Chambliss. We would also like to thank the Molecular  
280 Biosciences Center for the use of the equipment in the core and other reagents used in this study.

281

282

283

284

285

286

287

288

289



Running head: RNA extraction and SARS-CoV-2

290

291

292 **References**

293 Ahmed, Warish, et al. “Surveillance of SARS-CoV-2 RNA in Wastewater: Methods  
294 Optimization and Quality Control Are Crucial for Generating Reliable Public Health  
295 Information.” *Current Opinion in Environmental Science & Health*, vol. 17, 2020, pp. 82–  
296 93., doi:10.1016/j.coesh.2020.09.003.

297 Ahmed, Warish, et al. “Comparison of Virus Concentration Methods for the RT-QPCR-Based  
298 Recovery of Murine Hepatitis Virus, a Surrogate for SARS-CoV-2 from Untreated  
299 Wastewater.” *Science of The Total Environment*, vol. 739, 2020, p. 139960.,  
300 doi:10.1016/j.scitotenv.2020.139960.

301 Betancourt, Walter Q., et al. “COVID-19 Containment on a College Campus via Wastewater-  
302 Based Epidemiology, Targeted Clinical Testing and an Intervention.” *Science of The Total  
303 Environment*, vol. 779, 2021, p. 146408., doi:10.1016/j.scitotenv.2021.146408.

304 Binnicker, Matthew J. “Challenges and Controversies to Testing for COVID-19.” *Journal of  
305 Clinical Microbiology*, vol. 58, no. 11, 2020, doi:10.1128/jcm.01695-20.

306 D’Aoust, Patrick M., et al. “Quantitative Analysis of SARS-CoV-2 RNA from Wastewater  
307 Solids in Communities with Low COVID-19 Incidence and Prevalence.” 2020,  
308 doi:10.1101/2020.08.11.20173062.

Running head: RNA extraction and SARS-CoV-2

- 309 Gandhi, Monica, et al. “Asymptomatic Transmission, the Achilles’ Heel of Current Strategies to  
310 Control Covid-19.” *New England Journal of Medicine*, vol. 382, no. 22, 2020, pp. 2158–  
311 2160., doi:10.1056/nejme2009758.
- 312 Graham, Katherine E., et al. “SARS-CoV-2 in Wastewater Settled Solids Is Associated with  
313 COVID-19 Cases in a Large Urban Sewershed.” *Environmental Science and Technology*,  
314 2021, 55(1), pp 488-498. doi: 10.1021/acs.est.0c06191.
- 315 Hamouda, Mohamed, et al. “Wastewater Surveillance for SARS-CoV-2: Lessons Learnt from  
316 Recent Studies to Define Future Applications.” *Science of The Total Environment*, vol.  
317 759, 2021, p. 143493., doi:10.1016/j.scitotenv.2020.143493.
- 318 Hart, Olga E., and Rolf U. Halden. “Computational Analysis of SARS-CoV-2/COVID-19  
319 Surveillance by Wastewater-Based Epidemiology Locally and Globally: Feasibility,  
320 Economy, Opportunities and Challenges.” *Science of The Total Environment*, vol. 730,  
321 2020, p. 138875., doi:10.1016/j.scitotenv.2020.138875.
- 322 Hata, Akihiko, et al. “Organic Substances Interfere with Reverse Transcription-Quantitative  
323 PCR-Based Virus Detection in Water Samples.” *Applied and Environmental Microbiology*,  
324 vol. 81, no. 5, 2015, pp. 1585–1593., doi:10.1128/aem.03082-14.
- 325 Jee, Youngmee. “WHO International Health Regulations Emergency Committee for the COVID-  
326 19 Outbreak.” *Epidemiology and Health*, vol. 42, 2020, doi:10.4178/epih.e2020013.

Running head: RNA extraction and SARS-CoV-2

- 327 Jones, Davey, et al. “Fecal Shedding of SARS-CoV-2 and Its Potential Role in Person-To-Person  
328 Transmission and the Environment-Based Spread of COVID-19.” 2020,  
329 doi:10.20944/preprints202007.0471.v1.
- 330 Kitajima, Masaaki, et al. “SARS-CoV-2 in Wastewater: State of the Knowledge and Research  
331 Needs.” *Science of The Total Environment*, vol. 739, 2020, p. 139076.,  
332 doi:10.1016/j.scitotenv.2020.139076.
- 333 Kitamura, Kouichi, et al. “Efficient Detection of SARS-CoV-2 RNA in the Solid Fraction of  
334 Wastewater.” *Science of The Total Environment*, vol. 763, 2021, p. 144587.,  
335 doi:10.1016/j.scitotenv.2020.144587.
- 336 Lorenzo, M., & Picó, Y. (2019). Wastewater-based epidemiology: Current status and future  
337 prospects. *Current Opinion in Environmental Science & Health*, 9, 77–84.  
338 <https://doi.org/10.1016/j.coesh.2019.05.007>
- 339 Lu, Dingnan, et al. “Primary Concentration – The Critical Step in Implementing the Wastewater  
340 Based Epidemiology for the COVID-19 Pandemic: A Mini-Review.” *Science of The Total  
341 Environment*, vol. 747, 2020, p. 141245., doi:10.1016/j.scitotenv.2020.141245.
- 342 Mesoraca, Alvaro, et al. “Evaluation of SARS-CoV-2 Viral RNA in Fecal Samples.” *Virology  
343 Journal*, vol. 17, no. 1, 2020, doi:10.1186/s12985-020-01359-1.
- 344 Mizumoto, Kenji, et al. “Estimating the Asymptomatic Proportion of Coronavirus Disease 2019  
345 (COVID-19) Cases on Board the Diamond Princess Cruise Ship, Yokohama, Japan, 2020.”  
346 *Eurosurveillance*, vol. 25, no. 10, 2020, doi:10.2807/1560-7917.es.2020.25.10.2000180.

Running head: RNA extraction and SARS-CoV-2

- 347 Moghadas, Seyed M., et al. “The Implications of Silent Transmission for the Control of COVID-  
348 19 Outbreaks.” *Proceedings of the National Academy of Sciences*, vol. 117, no. 30, 2020,  
349 pp. 17513–17515., doi:10.1073/pnas.2008373117.
- 350 Polo, David, et al. “Making Waves: Wastewater-Based Epidemiology for COVID-19 –  
351 Approaches and Challenges for Surveillance and Prediction.” *Water Research*, vol. 186,  
352 2020, p. 116404., doi:10.1016/j.watres.2020.116404.
- 353 Pérez-Cataluña, Alba, et al. “Comparing Analytical Methods to Detect SARS-CoV-2 in  
354 Wastewater.” *Science of The Total Environment*, vol. 758, 2021, p. 143870.,  
355 doi:10.1016/j.scitotenv.2020.143870.
- 356 Randazzo, Walter, et al. “SARS-CoV-2 RNA Titers in Wastewater Anticipated COVID-19  
357 Occurrence in a Low Prevalence Area.” *Water Research*, 2020,  
358 doi:10.1101/2020.04.22.20075200.
- 359 Ravi, Neeraja, et al. “Diagnostics for SARS-CoV-2 Detection: A Comprehensive Review of the  
360 FDA-EUA COVID-19 Testing Landscape.” *Biosensors and Bioelectronics*, vol. 165, 2020,  
361 p. 112454., doi:10.1016/j.bios.2020.112454.
- 362 Torii, Shotaro, et al. “Applicability of Polyethylene Glycol Precipitation Followed by Acid  
363 Guanidinium Thiocyanate-Phenol-Chloroform Extraction for the Detection of SARS-CoV-  
364 2 RNA from Municipal Wastewater.” *Science of The Total Environment*, vol. 756, 2021, p.  
365 143067., doi:10.1016/j.scitotenv.2020.143067.

Running head: RNA extraction and SARS-CoV-2

366 Treibel, Thomas A, et al. “COVID-19: PCR Screening of Asymptomatic Health-Care Workers at  
367 London Hospital.” *The Lancet*, vol. 395, no. 10237, 2020, pp. 1608–1610.,  
368 doi:10.1016/s0140-6736(20)31100-4.

369 Venugopal, Anila, et al. “Novel Wastewater Surveillance Strategy for Early Detection of  
370 Coronavirus Disease 2019 Hotspots.” *Current Opinion in Environmental Science &  
371 Health*, vol. 17, 2020, pp. 8–13., doi:10.1016/j.coesh.2020.05.003.

372 Wu, Jia-Rui. “SARS-CoV-2 and Its Infected World.” *Journal of Molecular Cell Biology*, 2021,  
373 doi:10.1093/jmcb/mjaa078.

374 Xagorarakis, Irene, and Evan O’Brien. “Wastewater-Based Epidemiology for Early Detection of  
375 Viral Outbreaks.” *Women in Water Quality*, 2019, pp. 75–97., doi:10.1007/978-3-030-  
376 17819-2\_5.

377 Ye, Yinyin, et al. “Survivability Partitioning, and Recovery of Enveloped Viruses in Untreated  
378 Municipal Wastewater.” *Environmental Science and Technology*, 2016,  
379 doi:10.1021/acs.est.6b00876.s001.

380 Zheng, Shufa, et al. “Viral Load Dynamics and Disease Severity in Patients Infected with SARS-  
381 CoV-2 in Zhejiang Province, China, January-March 2020: Retrospective Cohort Study.”  
382 *BMJ*, 2020, p. m1443., doi:10.1136/bmj.m1443.

383

384

Running head: RNA extraction and SARS-CoV-2

385

386

387

388 Figure legends

389 **Figure 1: Investigating impacts of dilutions between the four kits for a known positive**

390 **isolation site.** Impact of PCR inhibitors were examined using the isolation location (Site I), with

391 little difference observed in the Zymo Fecal kit between concentrate and diluted sample in

392 comparison to other kits. Interestingly, cp/L at the isolation site is markedly lower in the Qiagen

393 kit compared to others which is surprisingly considering that this kit has been used heavily in

394 wastewater testing of large municipalities.

395 **Figure 2: Average Copies/L normalized by population.** Average Copies/L was calculated by

396 dividing the number of residents for a specific site for the original, non-diluted sample.

397

398

399

**Figure 1: Investigating impacts of dilutions between the four kits for a known positive isolation site.**

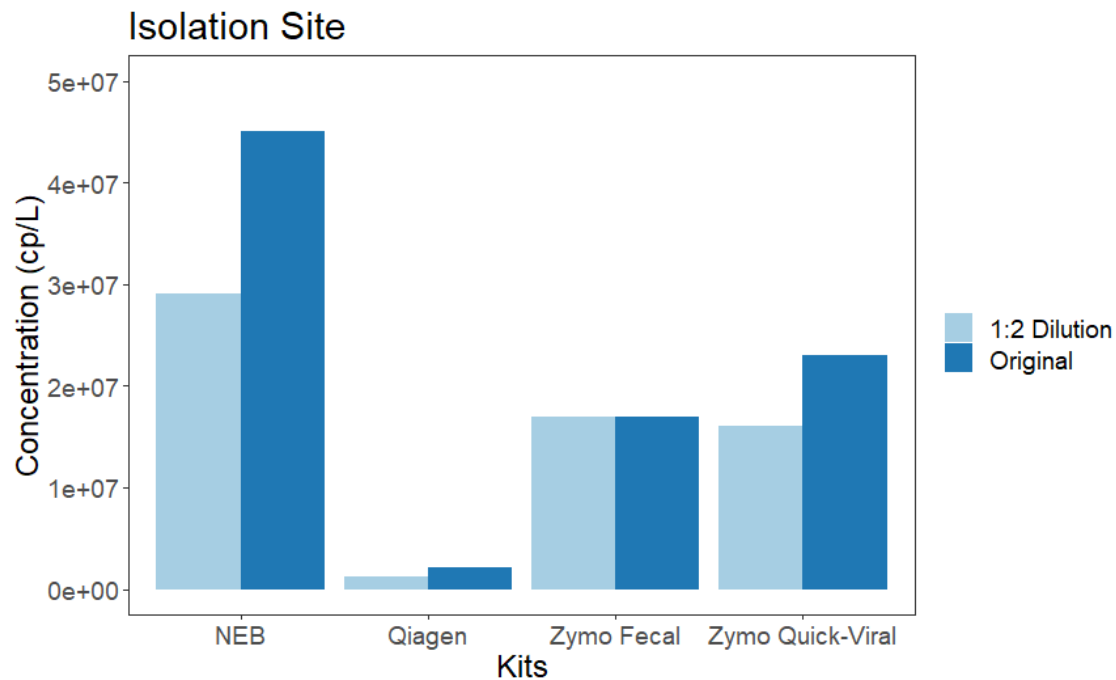

**Figure 1: Average Copies/L normalized by population.** Average Copies/L was calculated by dividing the number of residents for a specific site for the original, non-diluted sample.

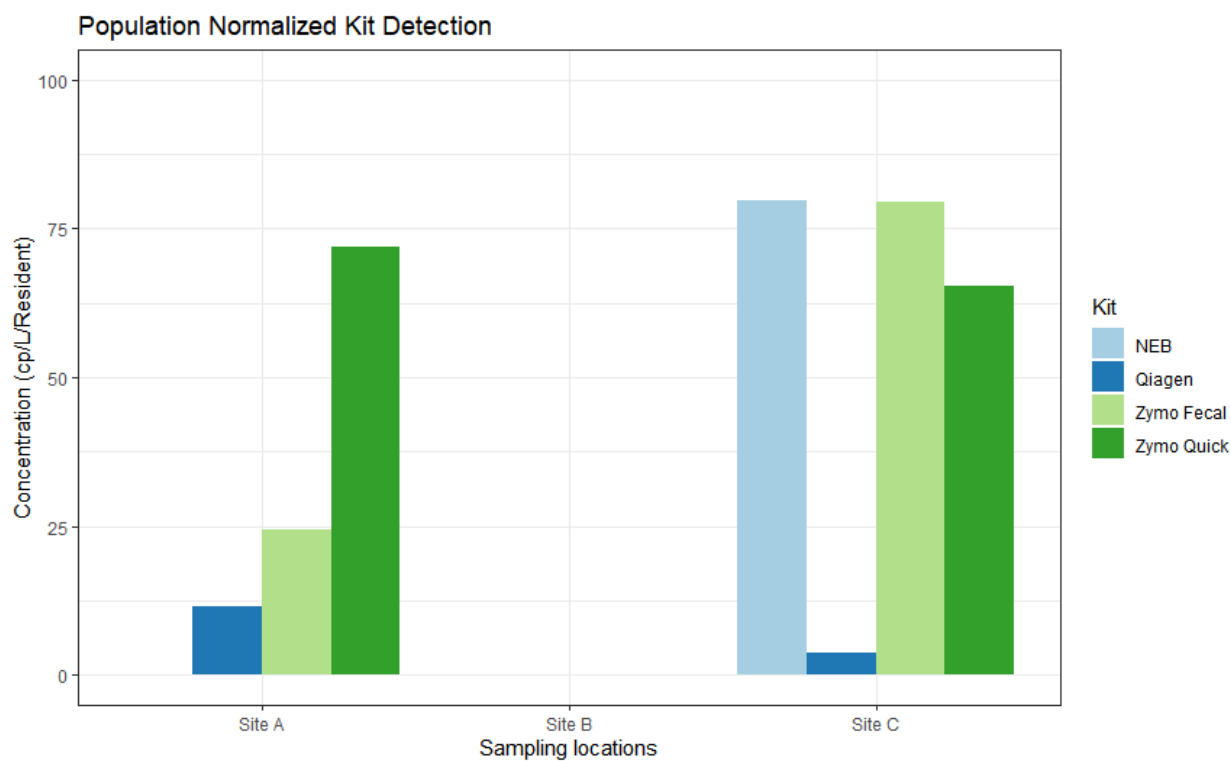



**Table 1: Campus sites and SARS-CoV-2 detection in Copies/L with 4 different commercial RNA extraction kits.**

| <b>Copies/Liter + Coefficient of Variation (CV)</b> |                                                     |                                              |                                                              |                                                    |
|-----------------------------------------------------|-----------------------------------------------------|----------------------------------------------|--------------------------------------------------------------|----------------------------------------------------|
|                                                     | <b>New England Biolabs Monarch RNA MiniPrep Kit</b> | <b>Qiagen AllPrep PowerViral DNA/RNA Kit</b> | <b>Zymo Quick RNA-Viral Fecal/Soil Microbe Microprep Kit</b> | <b>Zymo Quick RNA-Viral with Inhibitor Removal</b> |
| <b>Site A</b>                                       |                                                     |                                              |                                                              |                                                    |
| <b>undiluted</b>                                    | Not detected                                        | 6.2E+03<br>(19% CV)                          | 1.3E+04<br>(20% CV)                                          | 3.9E+04<br>(11% CV)                                |
| <b>1:2</b>                                          | 1.6E+04<br>(8% CV)                                  | 5.3E+03<br>(38% CV)                          | 1.1E+04<br>(12% CV)                                          | 4.0E+04<br>(16% CV)                                |
| <b>Site B</b>                                       |                                                     |                                              |                                                              |                                                    |
| <b>undiluted</b>                                    | Not detected                                        | Not detected                                 | Not detected                                                 | Not detected                                       |
| <b>1:2</b>                                          | Not detected                                        | Not detected                                 | Not detected                                                 | Not detected                                       |
| <b>Site C</b>                                       |                                                     |                                              |                                                              |                                                    |
| <b>undiluted</b>                                    | 1.2E+04<br>(29% CV)                                 | 5.7E+02<br>(87% CV)                          | 1.2E+04<br>(38% CV)                                          | 1.0E+04<br>(21% CV)                                |
| <b>1:2</b>                                          | 1.0E+04<br>(12% CV)                                 | 2.5E+02<br>(74% CV)                          | 7.3E+03<br>(7% CV)                                           | 9.8E+03<br>(10% CV)                                |
| <b>Site Isolation</b>                               |                                                     |                                              |                                                              |                                                    |
| <b>undiluted</b>                                    | 4.5E+07<br>(5% CV)                                  | 2.1E+06<br>(17% CV)                          | 1.7E+07<br>(26% CV)                                          | 2.3E+07<br>(8% CV)                                 |
| <b>1:2</b>                                          | 2.9E+07<br>(21% CV)                                 | 1.2E+06<br>(5% CV)                           | 1.7E+07<br>(4% CV)                                           | 1.6E+07<br>(9% CV)                                 |

**Table 1: Qualitative descriptions for each RNA extraction kit used.**

| <i>Qualitative Table for Extraction Methods</i> | <b>New England Biolabs Monarch RNA MiniPrep</b>                                                                            | <b>Qiagen AllPrep PowerViral DNA/RNA Kit</b>                   | <b>Zymo Quick-RNA Fecal/Soil Microbe MicroPrep</b>                       | <b>Zymo Quick-RNA Viral with Inhibitor Removal</b>                                                                         |
|-------------------------------------------------|----------------------------------------------------------------------------------------------------------------------------|----------------------------------------------------------------|--------------------------------------------------------------------------|----------------------------------------------------------------------------------------------------------------------------|
| <b>Time of Kit</b>                              | 30 mins                                                                                                                    | 1 hour                                                         | 1.5 Hours                                                                | 20 mins + 20 mins for Inhibitor Removal                                                                                    |
| <b>Price (at time of publication)</b>           | \$17.9/sample                                                                                                              | \$24.47/sample                                                 | \$10.44/sample                                                           | \$24.23/sample                                                                                                             |
| <b>Extra Equipment</b>                          | Floor Centrifuge                                                                                                           | Floor Centrifuge                                               |                                                                          | Floor Centrifuge                                                                                                           |
| <b>Consumables</b>                              | AMICON Ultrafilters                                                                                                        | AMICON Ultrafilters                                            | Nuclease Free Tubes (2 mL)                                               | AMICON Ultrafilters; Nuclease Free Tubes (2mL)                                                                             |
| <b>Type of Wastewater concentrate</b>           | Filtrate                                                                                                                   | Filtrate                                                       | Pellet                                                                   | Filtrate                                                                                                                   |
| <b>Extra Reagents</b>                           | 100% Ethanol                                                                                                               | B-Mercaptoethanol                                              | 100% Ethanol                                                             | 100% Ethanol                                                                                                               |
| <b>Extra Supplies</b>                           | RNase-free Tubes                                                                                                           | No                                                             | RNase-free Tubes                                                         | RNase-free Tubes                                                                                                           |
| <b>Effectiveness</b>                            | Lower                                                                                                                      | Lower                                                          | Higher                                                                   | Higher                                                                                                                     |
| <b>Overall Turn-around Time for 4 Samples</b>   | 9 hours                                                                                                                    | 9.5 hours                                                      | 5 hours                                                                  | 9 hours                                                                                                                    |
| <b>Qualitative Thoughts</b>                     | If using this kit, we would suggest also using the RNA Cleanup Kit recommended by representatives from New England Biolabs | Lost a significant amount of RNA sample compared to other kits | Kit is tedious with larger sample volumes, but overall gave best results | Especially with Inhibitor Removal step, could provide a comparative alternative for Fecal Kit, but longer processing times |
